# Supplementary material for: Drone-Based Hyperspectral and Thermal Imagery for Quantifying Upland Rice Growth and Water Use Efficiency After Biochar Application
Source: Preprints.org preprint supplement (doi:10.20944/preprints202104.0267.v1), 2021-04-09
Supplement: Supplementary file 1 [file supplementary]

**Drone-based hyperspectral and thermal imagery for quantifying upland rice growth and water use efficiency after biochar application**

**Supplementary Material**

1. **Estimation of canopy gap fraction and hemispherical transmittance**

The directional gap fraction is the directional upward transmittance through the canopy to the camera in field measurement, writing as

, (S1)

in which G is a geometric function of leaf angular distribution, being estimated from an ellipsoidal leaf angular distribution model [[1](#_ENREF_1)]:

, (S2)

where χ is the ratio of semi-axes of the ellipsoidal distribution model, estimated as χ = 0.409 using relation in [Wang*, et al.* [2](#_ENREF_2)] and discrete measurement of rice leaf angle distribution () from [Zhang*, et al.* [3](#_ENREF_3)]:

. (S3)

is called shading factor and is the hemispherical transmittance, estimated from

. (S4)

The estimated G = 0.245 for nadir direction and a χ of 0.409. The integral of Eq. (S4) has no analytical expression, instead, it can be approximated by using Matlab numerical integration and curve fitting toolbox (Matlab R2015b, MathWorks, USA).

1. **Variation propagation for estimating variations in GPP and water use efficiency**

The Gross primary productivity (GPP) can be modeled using a simple light use efficiency concept [[4](#_ENREF_4)] and considering the proportion of APAR absorbed by chlorophyll instead of whole canopy [[5](#_ENREF_5)]:

, (S5)

where ε is light use efficiency, fAPAR is the fraction of photosynthetically active radiation (PAR) absorbed by canopy. APAR, and PAR is the incoming PAR radiation in the spectrum range of 400nm to 700nm. CCC is the canopy chlorophyll content.

Since fAPAR has a linear relationship to normalized difference vegetation index NDVI [[6](#_ENREF_6)]:

, (S6),

where k is a constant slope in the linear relationship between fAPAR and NDVI. It is assumed that zero fAPAR for NDVI = 0.

From Eq. (S1) and (S2), GPP is then written as:

. (S7)

Using variation propagation [[7](#_ENREF_7)], the GPP change changes induced by NDVI and CCC variations is obtained using first-order difference and ignoring other minimal effects on light use efficiency parameters:

. (S8)

And the relative GPP variation is obtained by dividing GPP from both sides of Eq. (S8):

. (S9)

The standard error of the relative variation () is:

. (S10)

The relative NDVI variation between biochar group NDVI () and the control group NDVI () is:

. (S11)

The standard error (SE) of the variation is estimated from the SE of and :

. (S12)

And similarly the relative changes in CCC and the SE are written as:

. (S13)

. (S14)

The significance level of the variation can be given from the Student's t distribution. The variations and the SE of other variables were estimated similarly.

The water use efficiency (WUE) can be simply defined as the ratio of GPP to evapotranspiration (ET) water loss:

. (S15)

The variation in WUE in deuced from both GPP and ET variations is obtained using first-order difference:

. (S16)

The relative WUE variation is obtained by dividing WUE from both sides of Eq. (S16):

. (S17)

The standard error of the relative variation is:

. (S18)

**Table S1**. Statistics for variables of the biochar experiment

| Variables | | C | BC1 | ΔBC1−C / C | | BC2 | ΔBC2−C / C | | Standard error (SE) | SE / C |
| --- | --- | --- | --- | --- | --- | --- | --- | --- | --- | --- |
| Mean | Mean | % | *p*-value | Mean | % | *p*-value | % |
| Soil properties | θ_UAS (m3/m3) | 0.203 | 0.239 | **17.7** | **<0.001** | 0.225 | **10.8** | **<0.001** | 0.0001 | 0.1 |
| θ_*in situ* (m3/m3) | 0.193 | 0.210 | 8.8 | 0.396 | 0.208 | 7.8 | 0.522 | 0.007 | 5.1 |
| ψ_UAS (MPa) | -0.172 | -0.095 | **44.8** | **<0.001** | -0.289 | **− 66.9** | **<0.001** | 0.001 | 0.7 |
| ψ_*in situ* (MPa) | -0.401 | -0.500 | − 24.7 | 0.672 | -0.871 | − 117.2 | 0.233 | 0.156 | 55.0 |
| Soil N content (%) | 0.153 | 0.147 | − 3.9 | 0.392 | 0.157 | 2.6 | 0.786 | 0.003 | 2..8 |
| Soil albedo (-) | 0.216 | 0.217 | **0.5** | **0.003** | 0.219 | **1.4** | **<0.001** | 0.000 | 0.1 |
| Soil LST (°C) | 36.59 | 36.34 | **− 0.7** | **0.004** | 36.09 | **− 1.4** | **<0.001** | 0.047 | 0.2 |
| Leaf properties | Leaf water content (g/g) | 0.567 | 0.623 | 9.9 | 0.143 | 0.552 | − 2.6 | 0.866 | 0.020 | 5.0 |
| Leaf N content (%) | 0.593 | 0.788 | **32.9** | 0.035 | 0.554 | − 6.6 | 0.857 | 0.052 | 12.4 |
| Leaf P content (%) | 0.218 | 0.228 | 4.6 | 0.607 | 0.218 | 0.0 | 1.000 | 0.007 | 4.5 |
| Leaf K content (%) | 0.092 | 0.143 | **55.4** | 0.027 | 0.159 | **72.8** | 0.003 | 0.013 | 20.0 |
| Canopy properties | CCC (g/m2 ground) | 0.604 | 0.797 | **32.0** | <0.001 | 0.665 | **10.1** | 0.012 | 0.013 | 3.0 |
| NDVI (-) | 0.502 | 0.552 | **9.96** | <0.001 | 0.539 | **7.4** | <0.001 | 0.005 | 1.4 |
| GPP (gC/m2/day) | - | - | **41.9** | 0.003 | - | **17.5** | 0.018 | - | 3.4 |
| WUE (gC/kg H2O) | - | - | **40.8** | 0.004 | - | **13.4** | 0.031 | - | 3.5 |
| *fc* (-) | 0.288 | 0.303 | **5.2** | <0.001 | 0.277 | **− 3.8** | 0.007 | 0.002 | 1.0 |
| LAI (m2/m2) | 1.462 | 1.550 | **6.0** | <0.001 | 1.391 | **− 4.9** | 0.004 | 0.013 | 1.3 |
| Canopy albedo (-) | 0.292 | 0.294 | 0.7 | 0.523 | 0.283 | **− 3.1** | <0.001 | 0.001 | 0.5 |
| Canopy LST (°C) | 32.33 | 32.14 | **− 0.6** | 0.004 | 32.53 | **0.6** | 0.003 | 0.035 | 0.2 |
| Land surface energy components | Rn (W/m2) | 205.7 | 205.3 | − 0.2 | 0.838 | 210.3 | **2.3** | <0.001 | 0.460 | 0.3 |
| AE (W/m2) | 156.4 | 156.9 | 0.3 | 0.445 | 159.3 | **1.9** | <0.001 | 0.304 | 0.3 |
| EF (-) | 0.434 | 0.450 | **3.7** | 0.002 | 0.433 | − 0.2 | 0.951 | 0.003 | 1.0 |
| λET (W/m2) | 79.61 | 80.47 | 1.1 | 0.544 | 82.83 | **4.0** | 0.002 | 0.567 | 1.0 |
| H (W/m2) | 76.82 | 76.50 | − 0.4 | 0.812 | 76.48 | − 0.4 | 0.832 | 0.387 | 0.7 |
| G (W/m2) | 49.33 | 48.42 | **−** **1.8** | 0.011 | 51.05 | **3.5** | <0.001 | 0.195 | 0.6 |

Note: Standard error (SE) of the marginal mean is the same for all three groups. Red numbers show negative changes and green numbers positive changes in biochar groups compared with the control. Bold font indicates significant changes at p <0.05.

BC1: local bamboo biochar group, BC2: Taiwan sugarcane biochar group; C: control group

AE: available energy, Rn-G, or λET+H

CCC: canopy chlorophyll content

ET: evapotranspiration

EF: evaporative fraction, λET/AE

*fc*: fractional vegetation cover

G: ground heat flux

GPP: gross primary productionH: sensible heat flux

H: sensible heat flux

LAI: leaf area index

LST: land surface temperature

NDVI: normalized difference vegetation index

N, P, and K: nitrogen, phosphorous, and potassium

Rn: net radiation

SMP: soil matric potential

WUE: water use efficiency

θ: soil moisture content

λET: latent heat flux (energy form for ET)


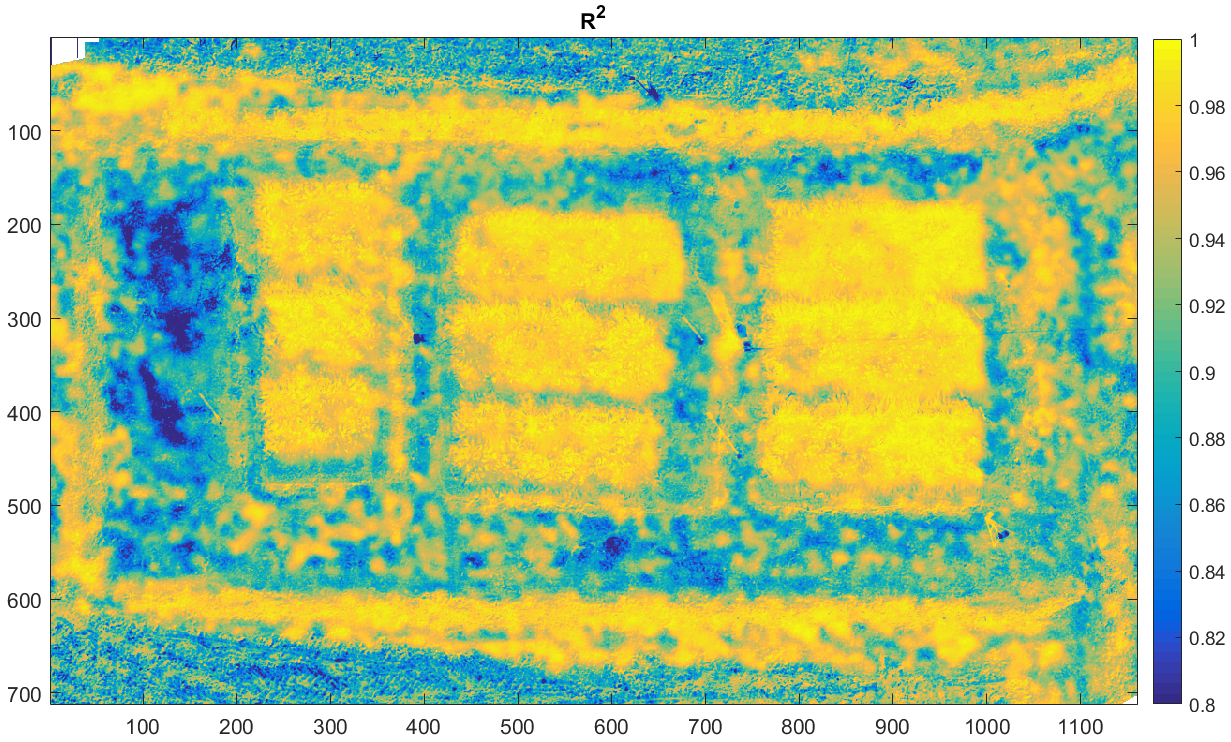

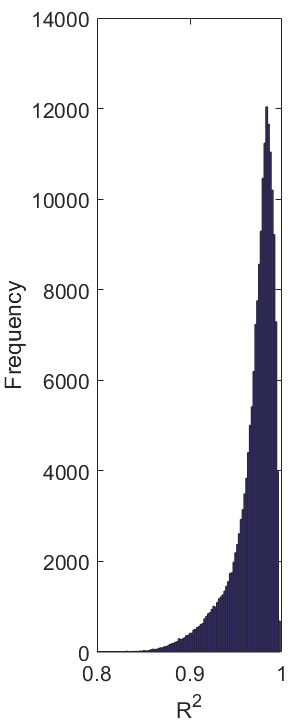


(a)


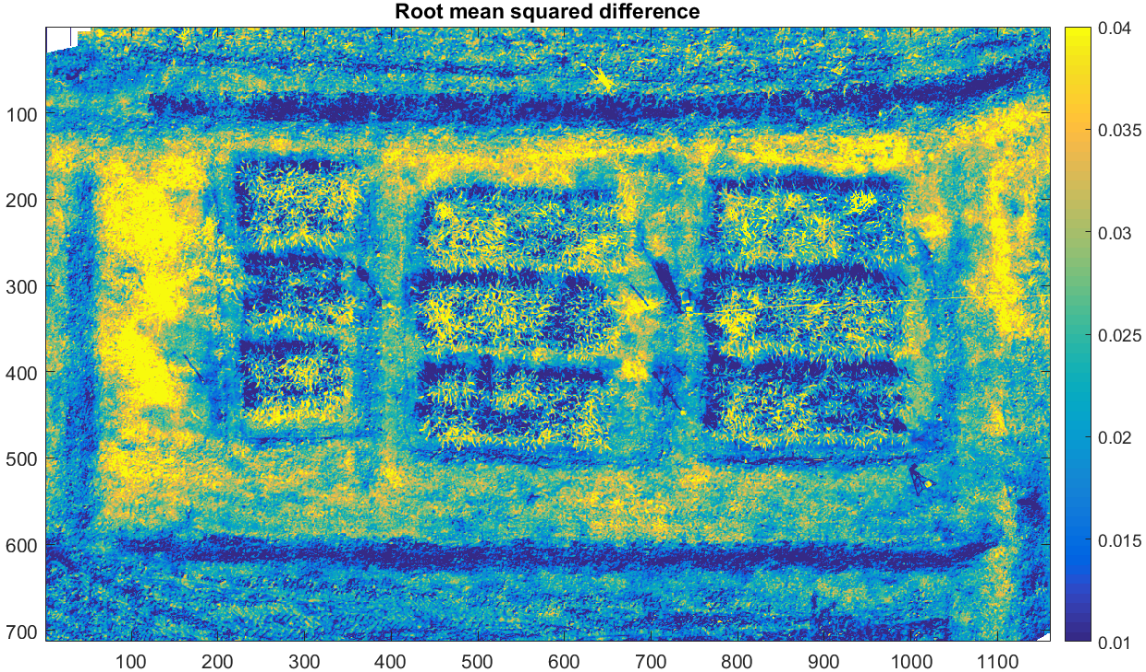

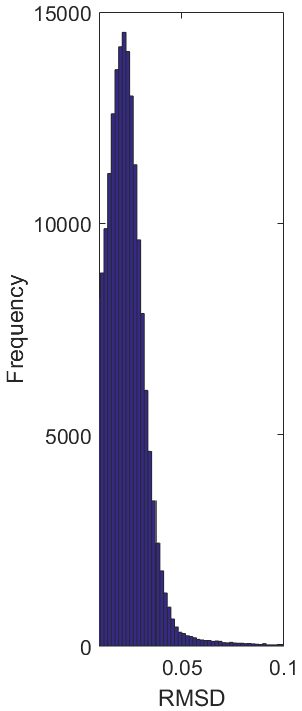


(b)

**Figure S1**. (a) R2 and (b) root mean squared difference (RMSD) between the UAS-measured and the Pro4SAIL-modeled hyperspectral reflectance using the parameters from the model inversion outputs. Histograms show the frequencies of these values over three groups of rice canopy.

**Figure S2**. (a) The comparison of plot-averaged soil moisture content (θ) in three groups BC1, BC2, and C from UAS over the period Nov 14 to 21, 2018 and during the four UAS campaigns. Whiskers denote 95 % confidence interval of each group on each day. Violin plots of θ from UAS in each plot and each treatment on (b) Nov16, (c) Nov 19, and (d) Nov-21. The shaded areas of the violin plot denote distribution of the day’s measurement, the white dots denote the median values, and the bottom and top edges of the black bars denote the 25th and 75th percentiles respectively. The red circle ‘○’ denotes sensor measurements during flight

**Figure S3**. (a) The comparison of plot-averaged soil matric potential (ψ) in three groups BC1, BC2, and C from UAS over the period Nov 14 to 21, 2018 and during the four UAS campaigns. Whiskers denote 95 % confidence interval of each group on each day. Violin plots of ψ from UAS in each plot and each treatment on (b) Nov16, (c) Nov 19, and (d) Nov-21. The shaded areas of the violin plot denote distribution of the day’s measurement, the white dots denote the median values, and the bottom and top edges of the black bars denote the 25th and 75th percentiles respectively. The red circle ‘○’ denotes sensor measurements during flight

(a)

(b)

**Figure S4**. (a) Water retention curves estimated from field measured soil matric potential (ψ) and soil moisture content using Van Genuchten model. (b) Comparison of evaporative fraction (EF) and soil matric potential (ψ). The solid lines are exponential fitting of EF-ψ relationships in three groups. Dash lines indicating the extrapolation of the fitting lines to EF = EFmax, using sigmoidal curves. Dot-dash line denotes field capacity (FC) at -0.05MPa. The wilting point (-1.5 MPa) is out of the x-axis range.

(a)

(b)

(c)

**Figure S5**. Overall relationships of (a) canopy chlorophyll content (CCC), (b) NDVI, and (c) LAI to soil moisture content in three groups BC1, BC2 and C.

**References**

1. Campbell, G.S.; Norman, J.M. *An Introduction to Environmental Biophysics*; Springer-Verlag New York, Inc. : 1998.

2. Wang, W.M.; Li, Z.L.; Su, H.B. Comparison of leaf angle distribution functions: Effects on extinction coefficient and fraction of sunlit foliage. *Agricultural and Forest Meteorology* **2007**, *143*, 106-122, doi:https://doi.org/10.1016/j.agrformet.2006.12.003.

3. Zhang, X.-c.; Lu, C.-g.; Hu, N.; Yao, K.-m.; Zhang, Q.-j.; Dai, Q.-g. Simulation of Canopy Leaf Inclination Angle in Rice. *Rice Science* **2013**, *20*, 434-441, doi:https://doi.org/10.1016/S1672-6308(13)60161-4.

4. Monteith, J.L. Solar radiation and productivity in tropical ecosystems. *The Journal of Applied Ecology* **1972**, *9*, 747-766.

5. Zhang, F.; Zhou, G. Deriving a light use efficiency estimation algorithm using in situ hyperspectral and eddy covariance measurements for a maize canopy in Northeast China. *Ecology and Evolution* **2017**, *7*, 4735-4744, doi:doi:10.1002/ece3.3051.

6. Sellers, P.J. Canopy reflectance, photosynthesis and transpiration. *International Journal of Remote Sensing* **1985**, *6*, 1335-1372, doi:10.1080/01431168508948283.

7. Jin, H.; Eklundh, L. In Situ Calibration of Light Sensors for Long-Term Monitoring of Vegetation. *Geoscience and Remote Sensing, IEEE Transactions on* **2015**, *53*, 3405-3416, doi:10.1109/tgrs.2014.2375381.
